# Supplementary material
Source: publisher figshare collection journal article supplement (https://frontiersin.figshare.com/ndownloader/files/24191429)
Supplement: Supplementary file [file 24191429]

## Search Criteria

### 1) Embase

|     |                                                                                                                                                                                                                                                                                                                                                                                                            |
|-----|------------------------------------------------------------------------------------------------------------------------------------------------------------------------------------------------------------------------------------------------------------------------------------------------------------------------------------------------------------------------------------------------------------|
| 1.  | cerebrovascular disorders/ or exp basal ganglia cerebrovascular disease/ or exp brain ischemia/ or exp carotid artery diseases/ or exp cerebrovascular trauma/ or exp intracranial arterial diseases/ or exp intracranial arteriovenous malformations/ or exp "intracranial embolism and thrombosis"/ or exp intracranial hemorrhages/ or stroke/ or exp brain infarction/ or vertebral artery dissection/ |
| 2.  | (stroke or poststroke or post stroke or cerebrovasc\$ or brain vasc\$ or cerebral vasc\$ or cva\$ or apoplex\$ or SAH).tw.                                                                                                                                                                                                                                                                                 |
| 3.  | ((brain\$ or cerebr\$ or cerebell\$ or intracran\$ or intracerebral) adj5 (isch?emi\$ or infarct\$ or thrombo\$ or emboli\$ or occlus\$)).tw.                                                                                                                                                                                                                                                              |
| 4.  | ((brain\$ or cerebr\$ or cerebell\$ or intracerebral or intracranial or subarachnoid) adj5 (haemorrhage\$ or hemorrhage\$ or haematoma\$ or hematoma\$ or bleed\$)).tw.                                                                                                                                                                                                                                    |
| 5.  | 1 or 2 or 3 or 4                                                                                                                                                                                                                                                                                                                                                                                           |
| 6.  | (Assess\$ adj5 pain).mp.                                                                                                                                                                                                                                                                                                                                                                                   |
| 7.  | (Measur\$ adj5 pain).mp.                                                                                                                                                                                                                                                                                                                                                                                   |
| 8.  | (Scale\$ adj5 pain).mp.                                                                                                                                                                                                                                                                                                                                                                                    |
| 9.  | (Rating adj5 pain).mp.                                                                                                                                                                                                                                                                                                                                                                                     |
| 10. | exp Pain Measurement/                                                                                                                                                                                                                                                                                                                                                                                      |
| 11. | exp Pain/di                                                                                                                                                                                                                                                                                                                                                                                                |
| 12. | *Pain Measurement/mt                                                                                                                                                                                                                                                                                                                                                                                       |
| 13. | exp *Pain Measurement/                                                                                                                                                                                                                                                                                                                                                                                     |
| 14. | (Pain adj3 tool\$).mp.                                                                                                                                                                                                                                                                                                                                                                                     |
| 15. | 6 or 7 or 8 or 9 or 10 or 11 or 12 or 13 or 14                                                                                                                                                                                                                                                                                                                                                             |
| 16. | 5 and 15                                                                                                                                                                                                                                                                                                                                                                                                   |

### 2) CINAHL

|                                                                                                                                                                          |
|--------------------------------------------------------------------------------------------------------------------------------------------------------------------------|
| stroke or cerebrovascular accident or cva or cerebral vascular event or cve<br>or transient ischaemic attack or tia (Title)<br>AND<br>pain or pain assessment (Abstract) |
|--------------------------------------------------------------------------------------------------------------------------------------------------------------------------|

### 3) PsychInfo

|                                                                                                                                                                          |
|--------------------------------------------------------------------------------------------------------------------------------------------------------------------------|
| stroke or cerebrovascular accident or cva or cerebral vascular event or cve<br>or transient ischaemic attack or tia (Title)<br>AND<br>pain or pain assessment (Abstract) |
|--------------------------------------------------------------------------------------------------------------------------------------------------------------------------|
